# Supplementary material for: Beneficial effect of ζ-carotene-like compounds on acute UVB irradiation by alleviating inflammation and regulating intestinal flora
Source: Royal Society of Chemistry journal article supplement (doi:10.1039/d3fo02502k), 2023-01-01
Supplement: d3fo02502k2.pdf [file d3fo02502k2.pdf]

Table S1 Sequences with similar functions found in the NCBI database

| Domain of function      | Species                              | Genbank number |
|-------------------------|--------------------------------------|----------------|
| polypentadiene synthase | <i>Physcomitrium patens</i>          | XP_024402925.1 |
|                         | <i>Dunaliella salina</i>             | APW83741.1     |
|                         | <i>Dunaliella parva</i>              | AMR55359.1     |
|                         | <i>Clitopilus passeckerianus</i>     | AVA16671.1     |
|                         | <i>Saccharomyces boulardii</i>       | KQC40560.1     |
|                         | <i>Deinococcus wulumuqiensis R12</i> | AKA42980.1     |
|                         | <i>Ceratodon purpureus</i>           | KAG0565415.1   |
|                         | <i>Sphagnum fallax</i>               | KAH8960311.1   |
|                         | <i>Sphagnum fallax</i>               | KAH8966241.1   |
|                         | <i>Sphagnum magellanicum</i>         | KAH9531242.1   |
|                         | <i>Sphagnum magellanicum</i>         | KAH9560870.1   |
|                         | <i>Marchantia polymorpha</i>         | PTQ43161.1     |
|                         | <i>Marchantia paleacea</i>           | KAG6548034.1   |
|                         | <i>Ceratodon purpureus</i>           | KAG0609433.1   |
|                         | <i>Amborella trichopoda</i>          | ERN17565.1     |
| phytylcopene desaturase | <i>Solanum lycopersicum</i>          | NP_001234812.1 |
|                         | <i>Citrullus lanatus</i>             | AGT57744.1     |
|                         | <i>Sphagnum magellanicum</i>         | KAH9533365.1   |
|                         | <i>Sphagnum fallax</i>               | KAH8933817.1   |
|                         | <i>Ceratodon purpureus</i>           | KAG0582240.1   |

---

|                        |                                       |                |
|------------------------|---------------------------------------|----------------|
|                        | <i>Ceratodon purpureus</i>            | KAG0582034.1   |
|                        | <i>Ceratodon purpureus</i>            | KAG0621537.1   |
|                        | <i>Ceratodon purpureus</i>            | KAG0582241.1   |
|                        | <i>Momordica charantia</i>            | AAR86104.1     |
|                        | <i>Quercus suber</i>                  | XP_023872284.1 |
|                        | <i>Physcomitrium patens</i>           | XP_024364025.1 |
|                        | <i>Arabidopsis thaliana</i>           | NP_001031895.1 |
|                        | <i>Cucurbita pepo</i>                 | AFV33363.1     |
|                        | <i>Dunaliella parva</i>               | ARH02607.1     |
|                        | <i>Dunaliella salina</i>              | AAT46069.1     |
|                        | <i>Selaginella moellendorffii</i>     | XP_002982526.2 |
| phytolycopene synthase | <i>Zea mays</i>                       | AAA99519.1     |
|                        | <i>Oryza sativa</i>                   | AAD02489.1     |
|                        | <i>Auxenochlorella protothecoides</i> | ADC32153.1     |
|                        | <i>Arabidopsis thaliana</i>           | AAK25906.1     |
|                        | <i>Chlamydomonas reinhardtii</i>      | AAT38476.1     |
|                        | <i>Dunaliella salina</i>              | ABB51091.1     |
|                        | <i>Physcomitrium patens</i>           | XP_024359580.1 |
|                        | <i>Sphagnum magellanicum</i>          | KAH9559659.1   |
|                        | <i>Sphagnum fallax</i>                | KAH8959222.1   |
|                        | <i>Marchantia paleacea</i>            | KAG6551553.1   |
|                        | <i>Marchantia polymorpha</i>          | OAE28876.1     |

---

---

|                                    |                |
|------------------------------------|----------------|
| <i>Dunaliella salina</i>           | CAA75094.1     |
| <i>Diospyros kaki</i>              | ACY78343.1     |
| <i>Plagiochasma appendiculatum</i> | AHA43672.1     |
| <i>Selaginella moellendorffii</i>  | XP_002988989.1 |

---

Supplementary Table 2. The primers sequences of genes

| Gene name       | Primer forward 5'-3'     | Primer reversed 5'-3'     |
|-----------------|--------------------------|---------------------------|
| Nrf2            | CAGTGCTCCTATGCGTGAA      | GCGGCTTGAATGTTTGTC        |
| HO-1            | ACAGATGGCGTCACTTCG       | TGAGGACCCACTGGAGGA        |
| NQO1            | AGGATGGGAGGTACTCGAATC    | TGCTAGAGATGACTCGGAAGG     |
| COX-2           | GGTGCCTGGTCTGATGATG      | TGCTGGTTTGGAAATAGTTGCT    |
| P-38            | GATACAAAGACGGGGCATCG     | CACGATGTTGTTTCAGGTCCG     |
| ERK             | GCCTTCCAACCTCCTGCTGAAC   | CGTACTCTGTCAAGAACCCTGTGTG |
| JNK             | CGCCTTATGTGGTGACTCGCTAC  | CTCCCATGATGCACCCAAGTAC    |
| MMP-1           | ATTCTACTGATATCGGGGCTTTGA | ATGTCCTTGGGGTATCCGTGTAG   |
| MMP-2           | ACCATGCGGAAGCCAAGATGTG   | AGGGTCCAGGTCAGGTGTGTAAC   |
| collagen type I | AGGGCAAAGATCCCTGAAGT     | GGCAGAAAGCACAGCACTC       |
| AP-1            | CTTCTACGACGATGCCCTCAACG  | GCCAGGTTCAAGGTCATGCTCTG   |
| GAPDH           | AGGTCGGTGTGAACGGATTTG    | GGGGTCGTTGATGGCAACA       |

Supplementary Table 3. The optimized sequences of *pnCrtE*, *pnCrtB*, *pnCrtP*.

| Gene name     | Optimized sequences                                                                                                                                                                                                                                                                                                                                                                                                                                                                                                                                                                                                                                                                                                                                                                                                                                                                                                                         |
|---------------|---------------------------------------------------------------------------------------------------------------------------------------------------------------------------------------------------------------------------------------------------------------------------------------------------------------------------------------------------------------------------------------------------------------------------------------------------------------------------------------------------------------------------------------------------------------------------------------------------------------------------------------------------------------------------------------------------------------------------------------------------------------------------------------------------------------------------------------------------------------------------------------------------------------------------------------------|
| <i>pnCrtE</i> | <p>ATGGGTAGCACCGTTATTGCACCGGGTTCTCAGTGTGTTGGC<br/> TTCAGCGTGGCGCGTCCGAACCTGACCACCTCTAAATCTGAA<br/> ACCCGTCAGCTGCAGCTGCGTACCCAGTTCTACGGTGTGCGT<br/> TGCGCGGGCCTGACCCGTAGCGCGACCAACCCGGTGGTTGTG<br/> GTTCTGCAGCCGATCCGTGCGCAGTCTGTTATCAGCGAAGTT<br/> GAAGGTAAAGCGACCCCGGAAGCCGTTTCTAAAAGCCTGCA<br/> GCTGTTTGAATTCGCAACCTACATGAAAGGCAAAGCGAACTC<br/> CGTGAACGTTGCGCTGGATAAAGCGGTGCCGATGCAGTACCC<br/> GGAACAGATCCACGAAGCGATGCGTTACAGCCTGCTGGCGA<br/> GCGGCAAACGTGTGCGTCCGGCGCTGTGCATTGCGGCGTGCG<br/> AACTGGTGGGTGGCACCGAAGCAATGGCAATGCCGGCGGCG<br/> TGCGCCATGGAAATGGTTCACACCATGAGCCTGATCCACGAC<br/> GACCTGCCATGCATGGATAACGACGATCTGCGCCGCGGCAA<br/> GCCGACCCTGCACAAACTGTACAATGATGGCATGGCGGTGCT<br/> GGCAGGCGACGCGCTGCTGTCCTTCGCTTTCGAACACATCGC<br/> GCGTAGCACCACCGGCGTGGCGGCGGACCGTGTCTGCGCGT<br/> TATCGCGCATCTGGGCAAGGCTGTCGGCTCTGAAGGCCTGGT<br/> TGCGGGCCAGATCGTTGACCTGGCGTCTGAAGGCGATCCGAG<br/> CGTTGGCCTGGACACCCTGGAGTACGTTACACCCATAAAAC</p> |

---

CGCGGTCCTGCTGGAATCCGCGGTCGTGTGCGGCGCCATTCT  
CGGTGGTGCTAGCGAGGACGAAATTAACCGTCTGTCCCTGTA  
CGCGCGTAAACGTGGGCCTGCTGTTTCAGGTGGTTGATGACAT  
CCTGGACGTTACCAAAGCAGCGCGGAGCTGGGTAAAACCG  
CGGGCAAAGATCTGCTGGCGGATAAAGCGACCTACCCGAAG  
CTGCTGGGTCTGGAAAATCTAAAGAATTCGCTGAGGAACTG  
CGTCGTCGTGCACAGGAACAGCTGAGCGTTTTTCGATCAGCAG  
AAAGCTGCGCCGCTGCTGGGCCTGGCGGACTACATCGCGAAC  
CGTCAGAACTAAGCTT

ATGGGTAGCACCGTTATTGCACCGGGTTCTCAGTGTGTTGGC  
TTCAGCGTGGCGCGTCCGAACCTGACCACCTCTAAATCTGAA  
ACCCGTCAGCTGCAGCTGCGTACCCAGTTCTACGGGTGCGTT  
GCGCGGGCCTGACCCGTAGCGCGACCAACCCGGTGGTTGTGG  
TTCTGCAGCCGATCCGTGCGCAGTCTGTTATCAGCGAAGTTG  
AAGGTAAAGCGACCCCGGAAGCCGTTTCTAAAAGCCTGCAG

*pnCrtB*

CTGTTCGAATTCGCAACCTACATGAAAGGCAAAGCGAACTCC  
GTGAACGTTGCGCTGGATAAAGCGGTGCCGATGCAGTACCCG  
GAACAGATCCACGAAGCGATGCGTTACAGCCTGCTGGCGAG  
CGGCAAACGTGTGCGTCCGGCGCTGTGCATTGCGGCGTGCGA  
ACTGGTGGGTGGCACCGAAGCAATGGCAATGCCGGCGGCGT  
GCGCCATGGAAATGGTTCACACCATGAGCCTGATCCACGACG  
ACCTGCCATGCATGGATAACGACGATCTGCGCCGCGGCAAGC

---

---

CGACCCTGCACAAACTGTACAATGATGGCATGGCGGTGCTGG  
CAGGCGACGCGCTGCTGTCCTTCGCTTTCGAACACATCGCGC  
GTAGCACCACCGGCGTGGCGGCGGACCGTGTCTGCGCGTTA  
TCGCGCATCTGGGCAAGGCTGTCGGCTCTGAAGGCCTGGTTG  
CGGGCCAGATCGTTGACCTGGCGTCTGAAGGCGATCCGAGCG  
TTGGCCTGGACACCCTGGAGTACGTTACACCCATAAAAACCG  
CGGTCTGCTGGAATCCGCGGTCGTGTGCGGCGCCATTCTCG  
GTGGTGCTAGCGAGGACGAAATTAACCGTCTGTCCCTGTACG  
CGCGTAACGTGGGCCTGCTGTTTCAGGTGGTTGATGACATCC  
TGGACGTTACCAAAGCAGCGCGGAGCTGGGTAAAACCGCG  
GGCAAAGATCTGCTGGCGGATAAAGCGACCTACCCGAAGCT  
GCTGGGTCTGGAAAATCTAAAGAATTCGCTGAGGAACTGC  
GTCGTCGTGCACAGGAACAGCTGAGCGTTTTTCGATCAGCAGA  
AAGCTGCGCCGCTGCTGGGCCTGGCGGACTACATCGCGAACC  
GTCAGAACTAA  
ATGGCGACCACCATGACCACCGGTTTCAAAGCGACCGGTATC  
CCGACCTTCACCGGCGGCCTGCGTCCGGTTCGTCTGGCAACC  
GCGGCTGCGGCTCCGGCGCATCGCGTTGGTGGCTACCGTGCG  
CTGAAAGTTGTTGCTGTTGATTACCCGCGTCCGGACATCGAT  
TCTTCTACCAACTTCCTGGAAGCCGCAGCTCTGTCTGCTTACA  
*pnCrtP* TCGGTGATGCGCCGCGTCCGCCGAAACCGCTGAAAGTTGTTA  
TCGCGGGTGCAGGTCTGGCGGGCCTGTCTACCGCTAAATACG

---

---

TTGCTGACTCAGGTCACATCCCGATCCTGCTGGAAGCTCGTG  
ATGTGCTGGGCGGTAAAGTTGCTGCGTGGAAGATAAAGAT  
GGTGATTGGTATGAAACCGGTCTGCACATTTTCTTCGGTGCG  
TACCCGAACATGCAGAACCTGTTTCGGCGAACTGGGTATTAAC  
GACCGTCTGCAGTGGAAGAACAACACTCCATGATTTTCGCCATG  
CCGATAAACCGGGCGAATTCTCCCGTTTTGATTTCCCGGAA  
ATCCCGGCACCGCTGAACGGTGTTTGGGCGATCCTGAAAAAT  
AACGAAATGCTGACCTTCCCGGAAAAAGTTCGTTTCGCGATC  
GGTCTGCTGCCGGCAATTGTTGGCGGCCAGGCGTACGTGGAA  
GCCCAGGACGGTCTGACCGTGCGTGAATGGATGCTGAAACA  
GGGTGTGCCGGAACGTGTTAACGATGAAGTTTTTCATCGCCAT  
GTCTAAAGCGCTGAACTTTATTGACCCGGATGATCTGTCAAT  
GCAGTGCGTGCTGATCGCGCTGAACCGTTTTCTGCAGGAAAC  
CCACGGTTCCAAAATGGCGTTTTCTGGATGGCGCGCCCGCGGA  
ACGTCTGTGTCAGCCGATTGTGGACCACTTCAAAGCTCTGGG  
TGGTGAAGTGCGTCTGAACGCTCGTCTGAAAGAAGTTGTTCT  
GAACGAAGATAACACCGTTAAACAACACTACCTGCTGACTGATGG  
CACCACTGTAGAAGGTGATGTGTACGTTTCCTCTATGCCGGT  
AGATATCGTTAAACTGATCATCCCGGACCAGTGGAACCGAT  
GCCGTACTIONCAAGAAAATGGATAAACTGGTTGGTGTTCGGT  
AATCAACGTTACATCTGGTTCGATCGTAAACTGAAAAACAC  
TTATGATCACCTGCTGTTCTCTCGTAGCCCGCTGCTGTCTGTT

---



---

TACGCTGATATGTCTACCACCTGTAAAGAATACTACGACCCG  
GAAAAAAGCATGCTGGAAGTGGTGTTCGCTCCGGCTGAAAA  
ATGGATCTCTAAAAGCGATCAGGAAATCATCGATGCAACCAT  
GGAAGAACTGGCTAAACTGTTCCCGGATGAAATTGCGGCTGA  
TCAGTCTAAAGCTAAAATTCTGAAATACCACGTTGTAAAAC  
CCCGCGTTCTGTTTATAAAACCGTTCCGAACTGCGAACCGTG  
CCGTCCGCTGCAGCGTAGCCCGATTAAACGTTTCTATATGGC  
AGGTGATTTTACCAAACAGAAATACCTGGCGAGCATGGAAG  
GTGCAGTTCTGAGTGGTAAATTCTGCGCACAGGCGATCGTTC  
AGGATTATATGGCGGGCGTTCTGACTCCGGGCAGCGAAAAA  
GAAGAAGAAGTTGTTCTGGTTAGCCAGTAA

---

A CrtE

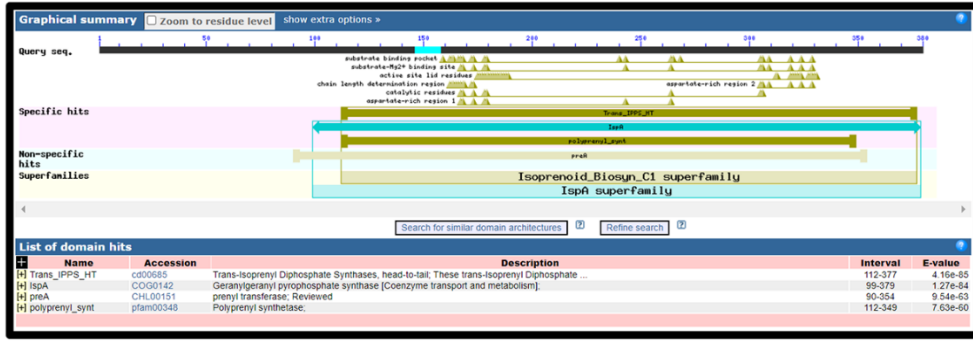

B CrtB

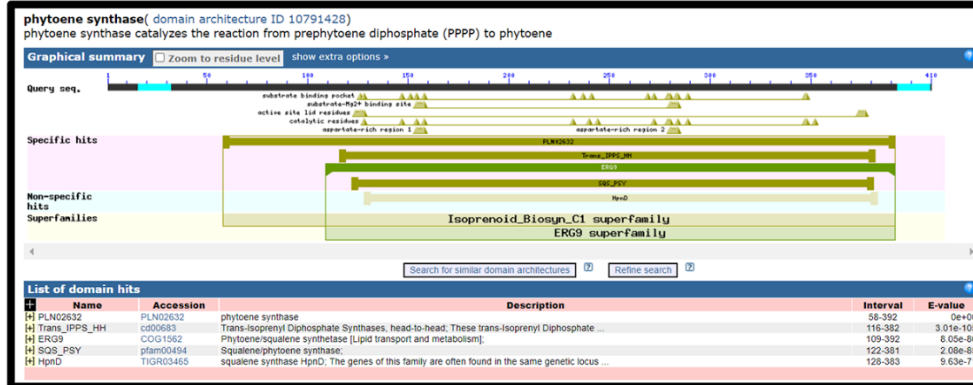

C PDS

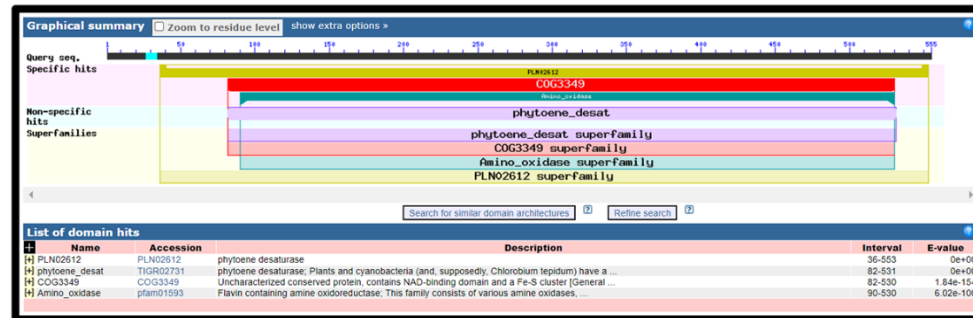

Fig S1. The amino acid functional domains from NCBI

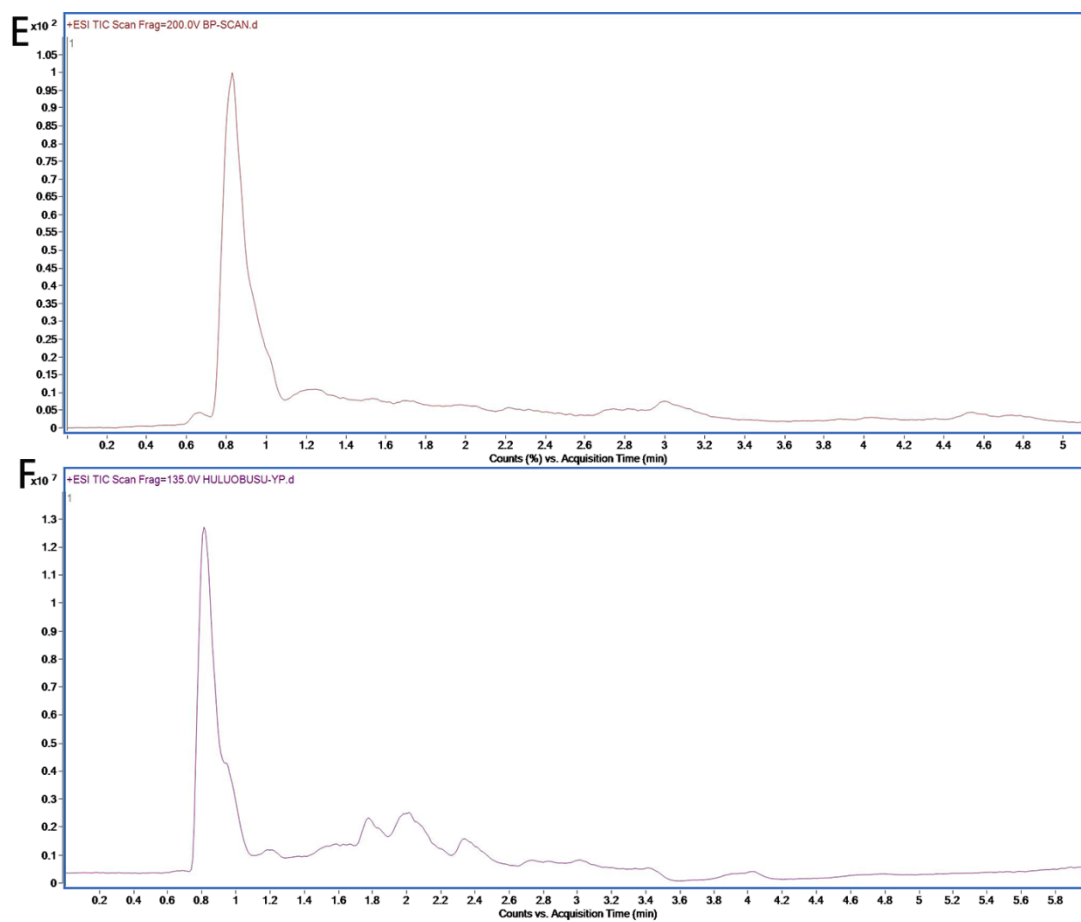

Fig S2.  $^+$ ESI TIC scan ion peaks of  $\zeta$ - carotene standard (A) and CE (B), respectively

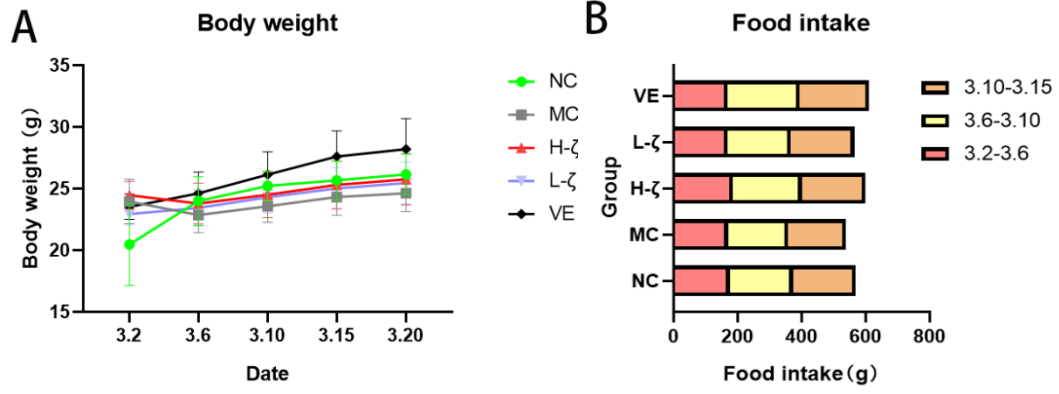

Fig S3. Changes in body weight(A) and feeding(B)

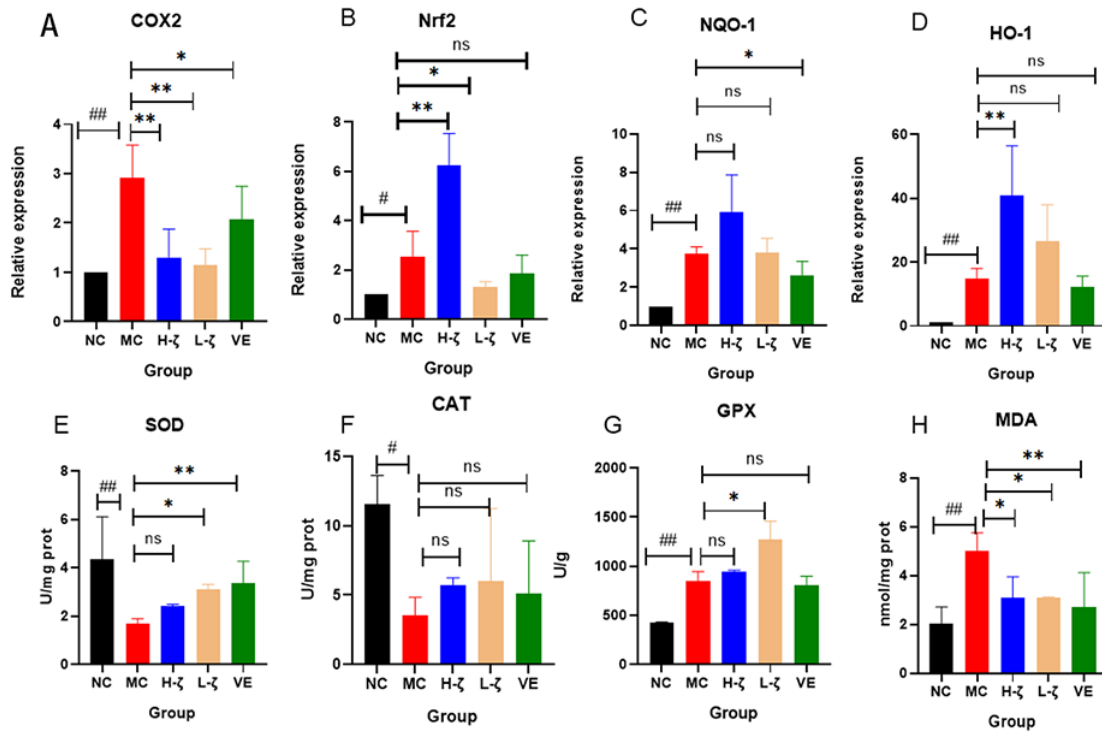

Fig S4. Nrf2/ARE antioxidant pathway, n=3. (# was MC vs NC P<0.05, ## was MC vs NC P<0.01, \* was  $\zeta$  or VE vs MC P<0.05, \*\* was  $\zeta$  or VE vs MC P<0.01, ns was no significance).

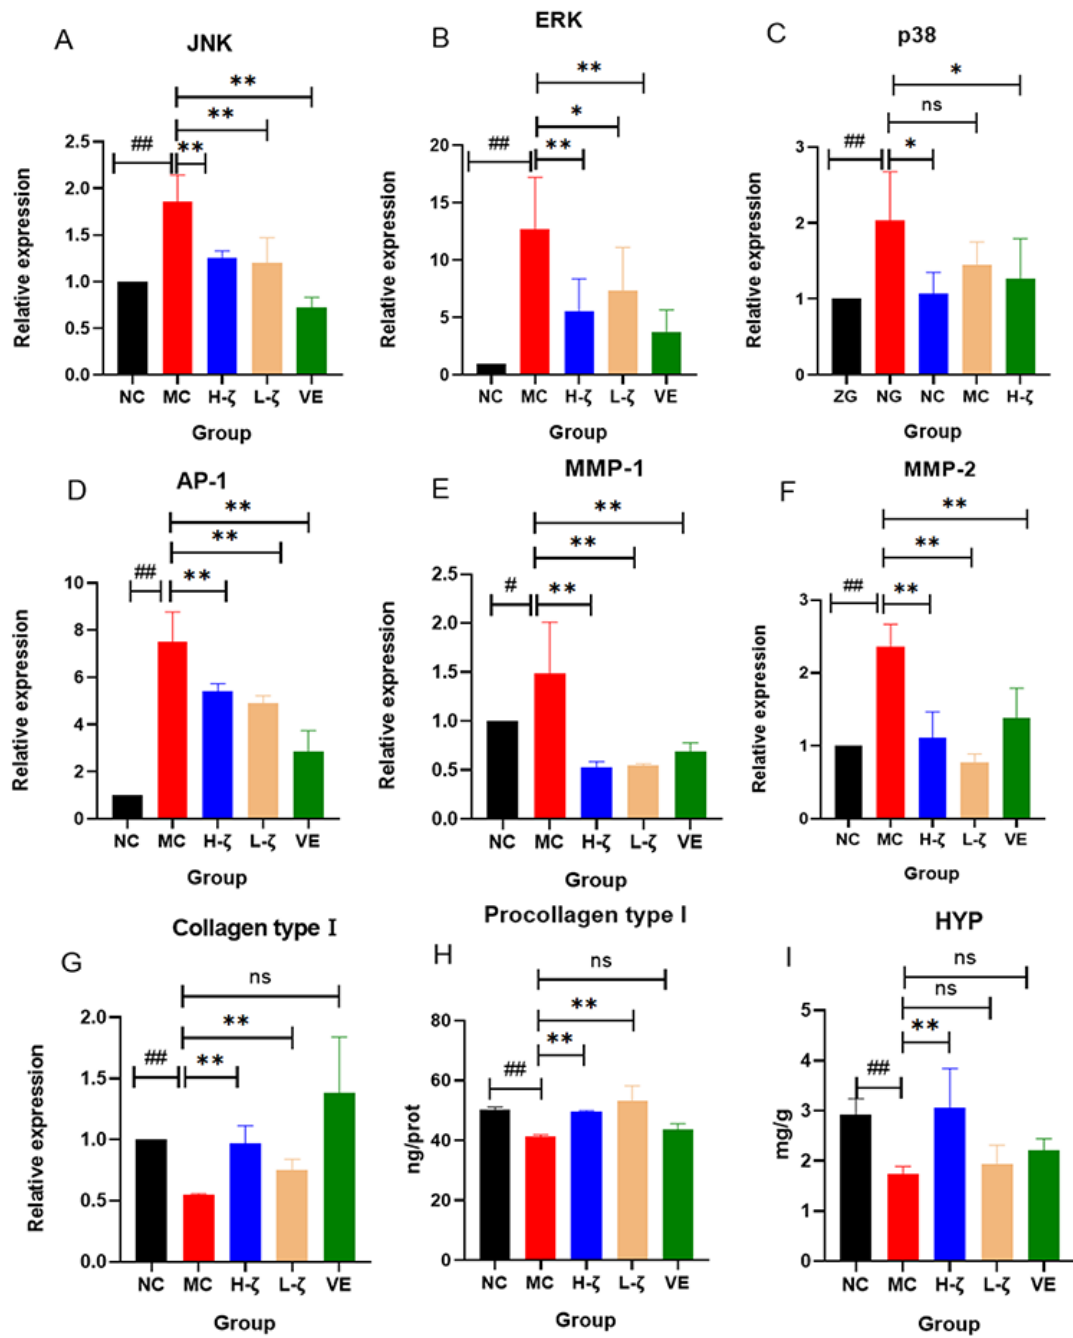

Fig S5. MAPK pathway (A-D) and collagen synthesis related factors (E-I), n=3. (# was MC vs NC P<0.05, ## was MC vs NC P<0.01, \* was ζ or VE vs MC P<0.05 \*\* was ζ or VE vs MC P<0.01, ns was no significance).

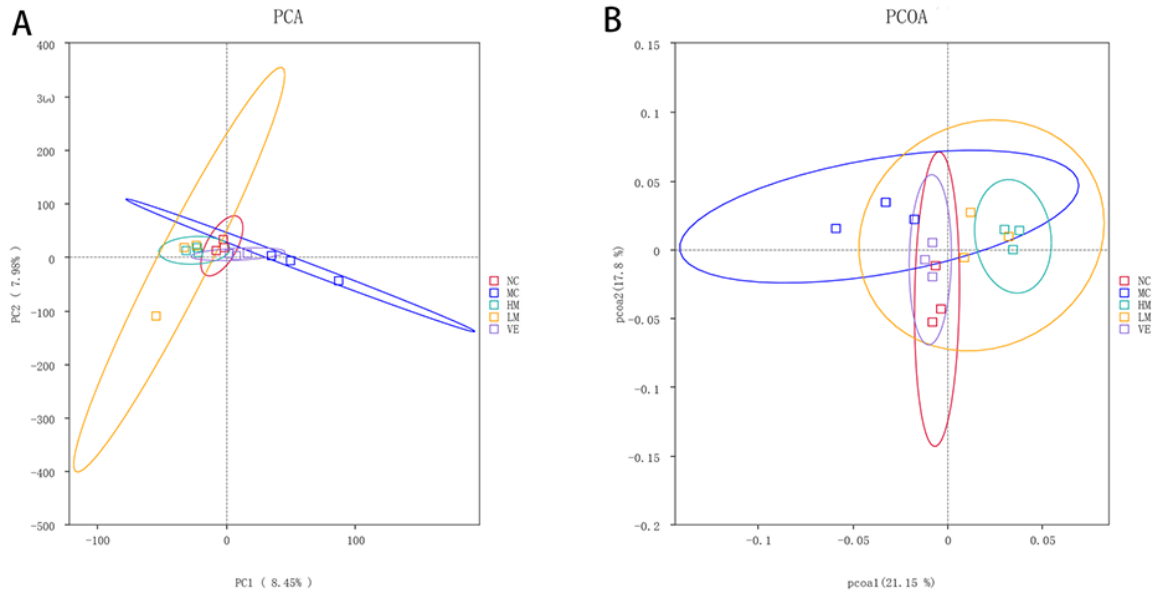

Fig S6. The beta diversity analysis of gut microbiota. (A was PCA and B was PCoA).

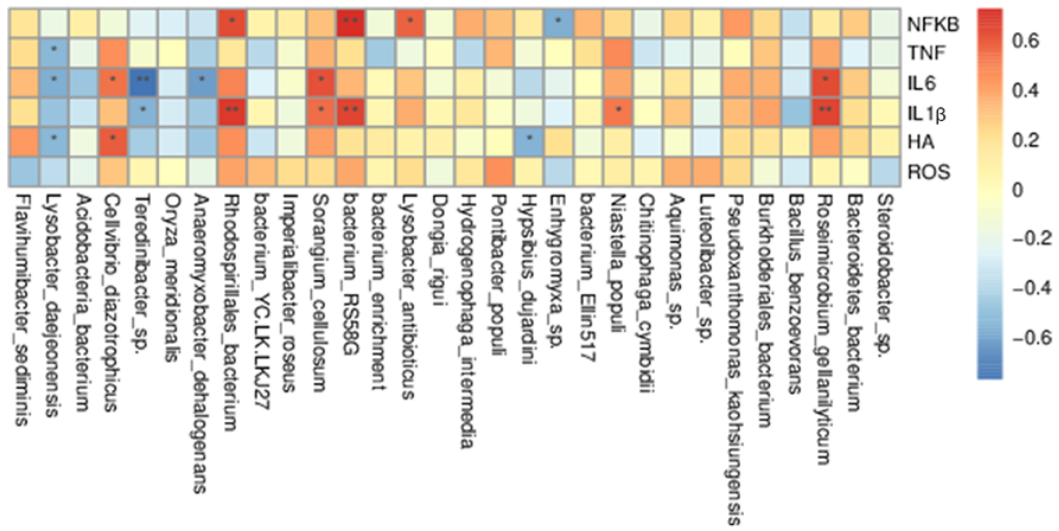

Fig S7. The Pearson correlation analysis of inflammatory factors at the species level
